# Supplementary material
Source: PubMed Central journal article supplement (PMC4136676)
Supplement: jp505860f_si_001.pdf [file jp505860f_si_001.pdf]

# Supporting Information

## Photocatalytic Oxygenation of 10-Methyl-9,10-dihydroacridine by O<sub>2</sub> with Manganese Porphyrins

*Jieun Jung,<sup>†</sup> Kei Ohkubo,<sup>†</sup> David P. Goldberg,<sup>\*,‡</sup> and Shunichi Fukuzumi<sup>\*,†</sup>*

*<sup>†</sup>Department of Material and Life Science, Graduate School of Engineering, ALCA, Japan Science and Technology Agency, Osaka University, Suita, Osaka 565-0871, Japan*

*<sup>‡</sup>Department of Chemistry, The Johns Hopkins University, Baltimore, Maryland 21218, United States*

E-mail: fukuzumi@chem.eng.osaka-u.ac.jp, dpg@jhu.edu

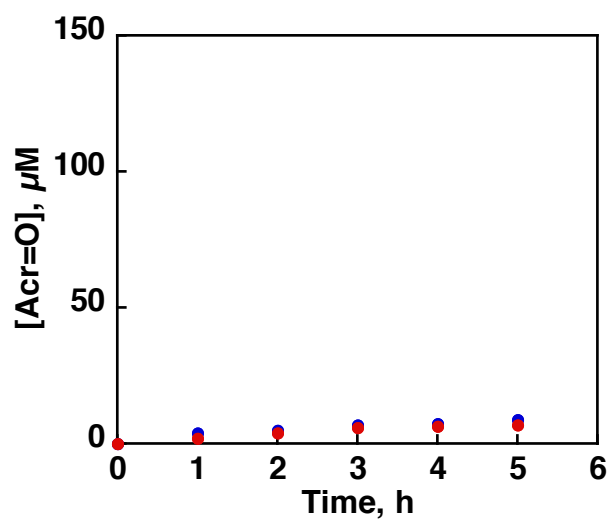

**Figure S1.** Time courses of formed Acr=O for the photocatalytic reaction under photoirradiation ( $\lambda > 480$  nm) of an  $\text{N}_2$ -saturated PhCN solution (2.0 mL) containing (TMP) $\text{Mn}^{\text{III}}(\text{OH})$  (blue,  $1.0 \times 10^{-5}$  M) or (TPFPP) $\text{Mn}^{\text{III}}(\text{CH}_3\text{COO})$  (red,  $1.0 \times 10^{-5}$  M) and AcrH<sub>2</sub> (0.02 M) at room temperature.

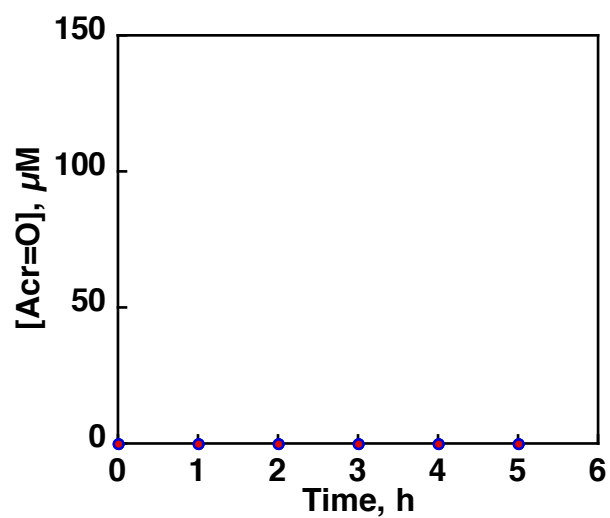

**Figure S2.** Time courses of formed Acr=O without photoirradiation of an O<sub>2</sub>-saturated PhCN solution (2.0 mL) containing (TMP)Mn<sup>III</sup>(OH) (blue,  $1.0 \times 10^{-5}$  M) or (TPFPP)Mn<sup>III</sup>(CH<sub>3</sub>COO) (red,  $1.0 \times 10^{-5}$  M) and AcrH<sub>2</sub> (0.02 M) at room temperature.

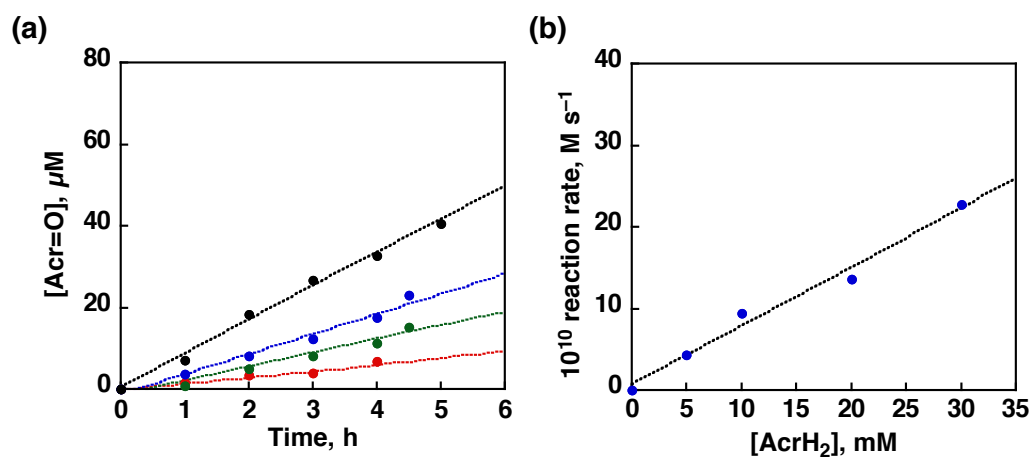

**Figure S3.** (a) Plots of the formation of Acr=O and (b) plot of the initial reaction rate of the photocatalytic oxygenation of AcrH<sub>2</sub> under irradiation ( $\lambda > 480$  nm) of an O<sub>2</sub>-saturated PhCN solution containing (TPFPP)Mn<sup>III</sup>(CH<sub>3</sub>COO) ( $1.0 \times 10^{-5}$  M) in the presence of 5 mM (red), 10 mM (green), 20 mM (blue), or 30 mM (black) of AcrH<sub>2</sub> as a substrate at 298 K vs concentration of AcrH<sub>2</sub>.

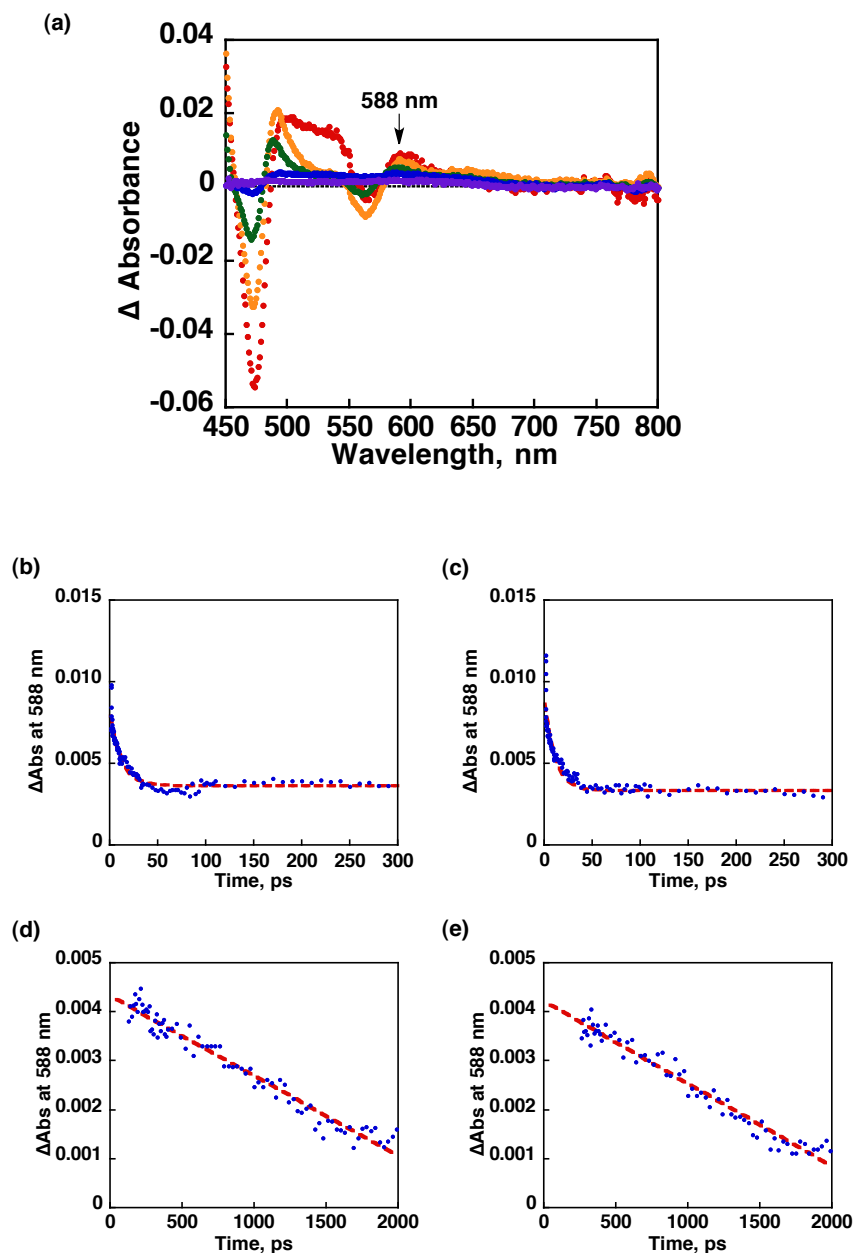

**Figure S4.** (a) Transient absorption spectral changes (red after 1 ps, orange after 2 ps, green after 10 ps, blue after 50 ps, and black after 2800 ps) after photoexcitation of (TPFPP)Mn<sup>III</sup>(CH<sub>3</sub>COO) in PhCN. Decay time profiles of absorbance at 588 nm due to [(TPFPP)Mn<sup>III</sup>(CH<sub>3</sub>COO)]\* (<sup>5</sup>T<sub>1</sub>) (b) in N<sub>2</sub>-saturated PhCN and (c) in O<sub>2</sub>-saturated PhCN. Time profiles of the decay of [(TPFPP)Mn<sup>III</sup>(CH<sub>3</sub>COO)]\* (<sup>7</sup>T<sub>1</sub>) at λ = 588 nm under (d) N<sub>2</sub> and (e) O<sub>2</sub>.

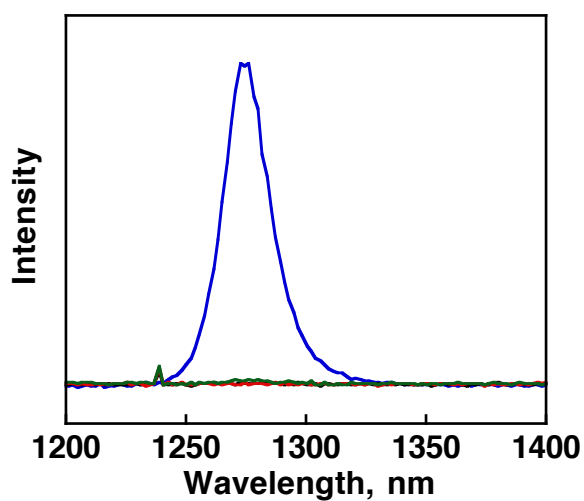

**Figure S5.** Phosphorescence spectra of singlet oxygen ( $\lambda_{\text{max}} = 1270$  nm) obtained by photoexcitation of C<sub>60</sub> (blue), (TMP)Mn<sup>III</sup> (green), (TPFPP)Mn<sup>III</sup> (red), and only solvent (black) as a blank in O<sub>2</sub>-saturated C<sub>6</sub>D<sub>6</sub>.

**Ful Author List of ref 13:**

(13) Company, A.; Sabenya, G.; González-Béjar, M.; Gómez, L.; Clémancey, M.; Blondin, G.; Jasniewski, A. J.; Puri, M.; Browne, W. R.; Latour, J.-M.; Que, Jr., L.; Costas, M.; Pérez-Prieto, J. Lloret-Fillol, J. Triggering the Generation of an Iron(IV)-Oxo Compound and Its Reactivity toward Sulfides by Ru<sup>II</sup> Photocatalysis. *J. Am. Chem. Soc.* **2014**, *136*, 4624–4633.
